# Supplementary material
Source: Springer Nature journal article supplement (https://www.springermedizin.de/resource/supplementary/12970_2009_159_MOESM3_ESM.pdf/9594576)

Correlation Loadings (X and Y)

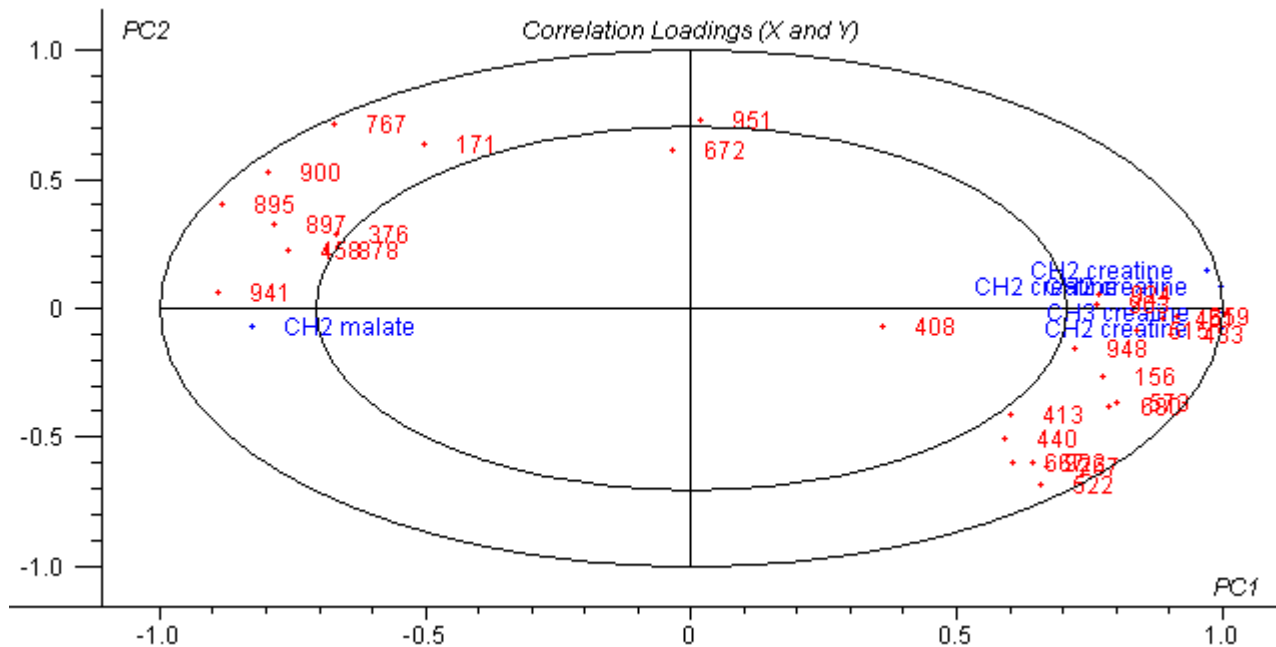

RESULT6, X-expl: 100%,0% Y-expl: 51%,18%

Supplement: MOESM3 [file 9594576]
